# Supplementary material
Source: PubMed Central journal article supplement (PMC4793344)

## Supplementary Online Content

**Supplementary figure 1a.** Flow chart for children with cerebral palsy (CP).

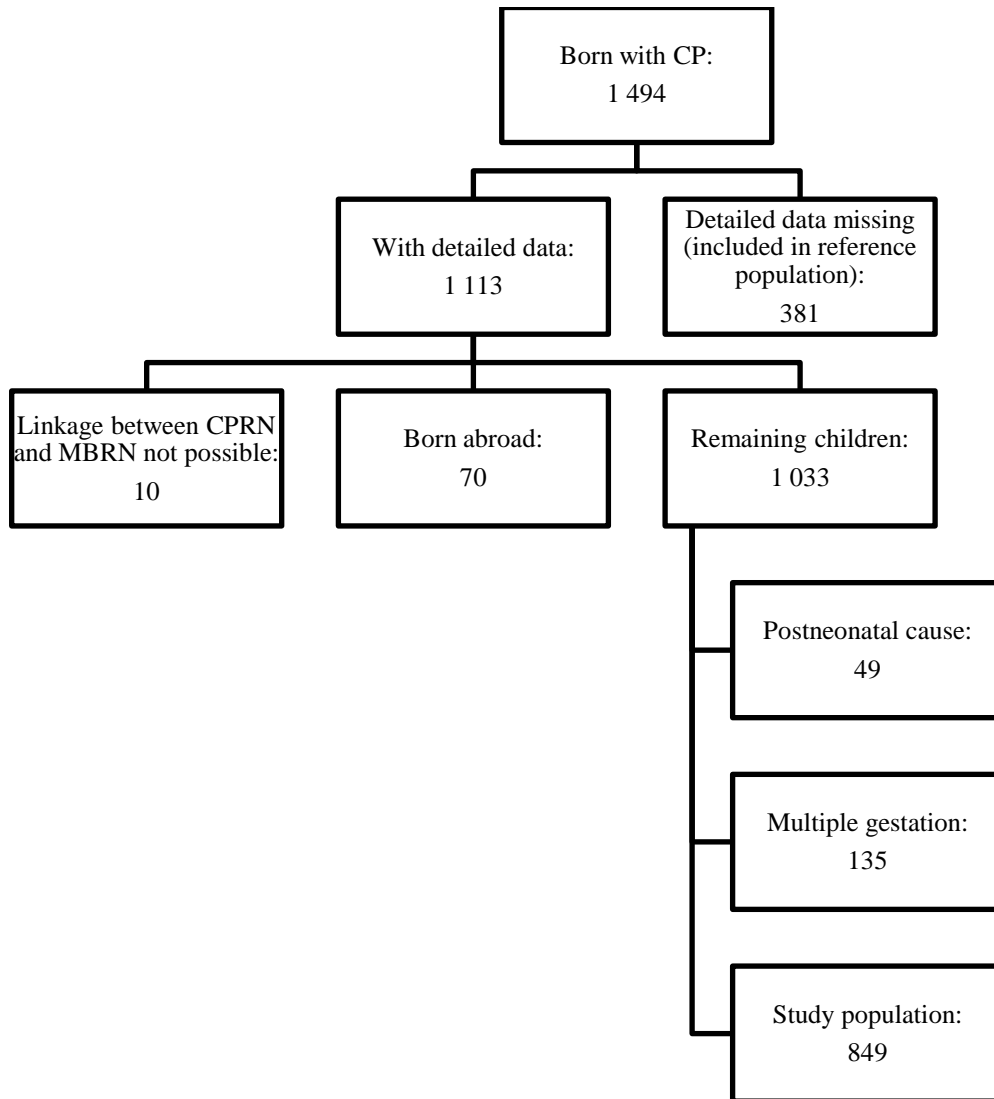

CPRN=Cerebral Palsy Registry of Norway, MBRN=Medical Birth Registry of Norway

**Supplementary figure 1b.** Flow chart for study population.

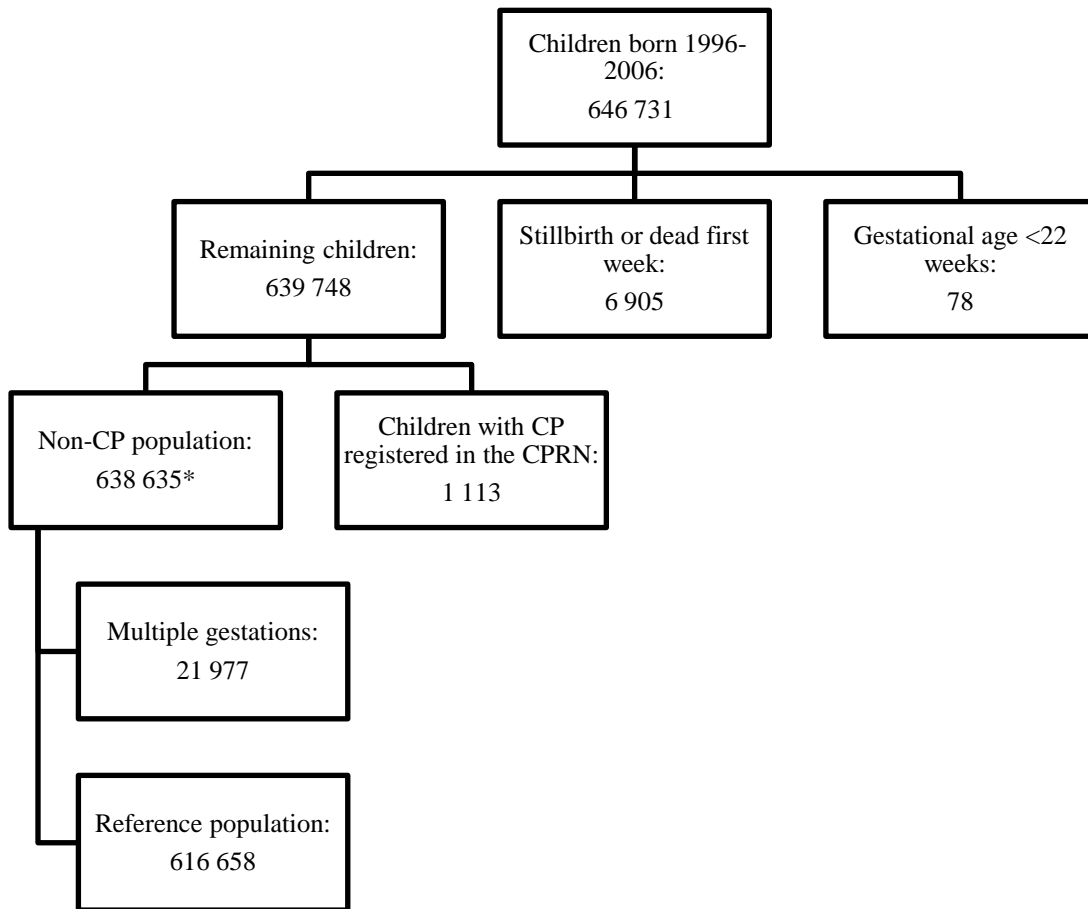

\*Includes 381 children with CP

CPRN=Cerebral Palsy Registry of Norway

**Supplementary figure 2.** Proposed conceptual hierarchical framework for the relationship between pre-eclampsia and cerebral palsy (CP). Hypothesized causal pathways added in models 1-3, as well as potential confounders, are shown in the figure. Covariates in the models were:

Model 1: Pre-eclampsia

Model 2: Pre-eclampsia + small for gestational age (SGA)

Model 3: Pre-eclampsia + SGA + gestational age (GA)

Model 4: Pre-eclampsia + SGA + GA + Pre-eclampsia\*GA

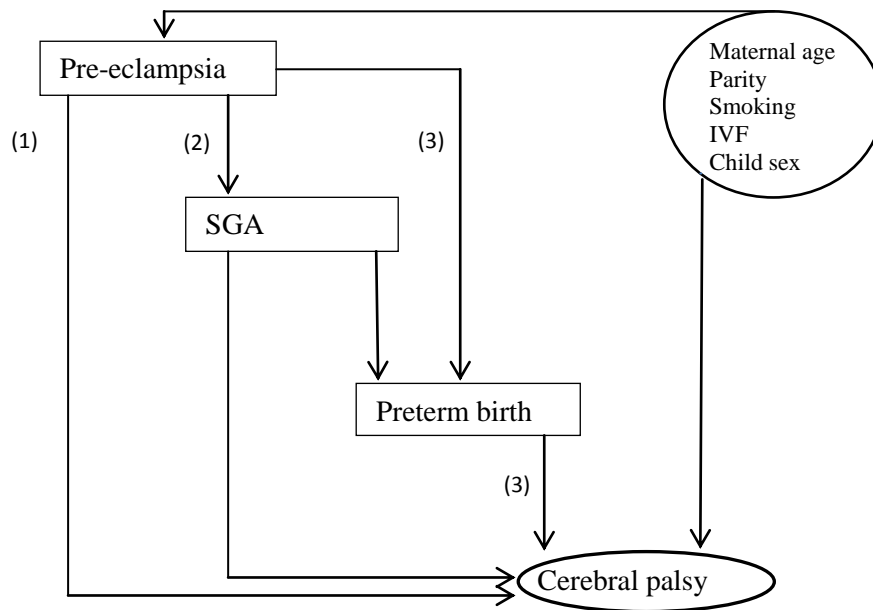

Supplement: strk009450.wf1_default.pdf [file strk009450.wf1_default.pdf]
